# Supplementary material for: An updated gene atlas for maize reveals organ‐specific and stress‐induced genes
Source: PubMed Central journal article supplement (PMC6850026; doi:10.1111/tpj.14184), 2019-01-22
Supplement: TPJ-97-1154-s001.pdf [file TPJ-97-1154-s001.pdf]

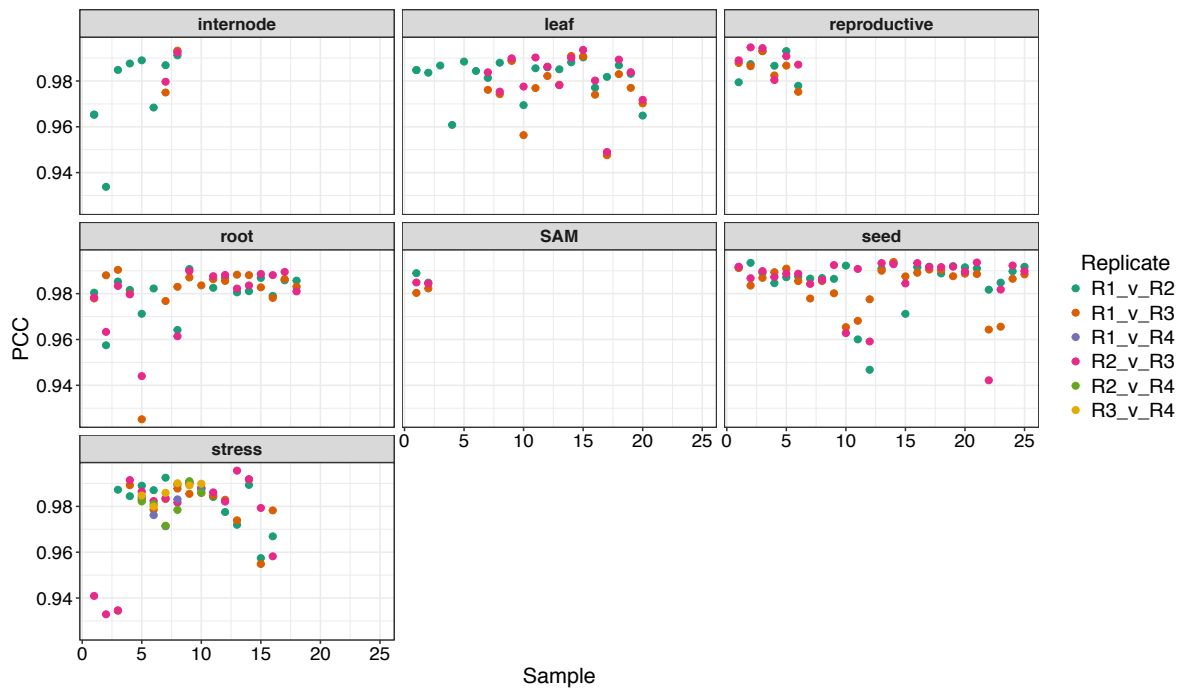

**Figure S1: Biological Replicate Pearson's Correlation Coefficients**

Pearson's correlation coefficients (PCC) were calculated among the biological replicates for each sample. The coefficients are plotted by sample and further separated by organ type and stress experiments. 'SAM' refers to shoot apical meristem. Coloring indicates which replicates were compared in a pair-wise fashion.
