# Supplementary material for: An updated gene atlas for maize reveals organ‐specific and stress‐induced genes
Source: PubMed Central journal article supplement (PMC6850026; doi:10.1111/tpj.14184), 2019-01-22
Supplement: TPJ-97-1154-s003.pdf [file TPJ-97-1154-s003.pdf]

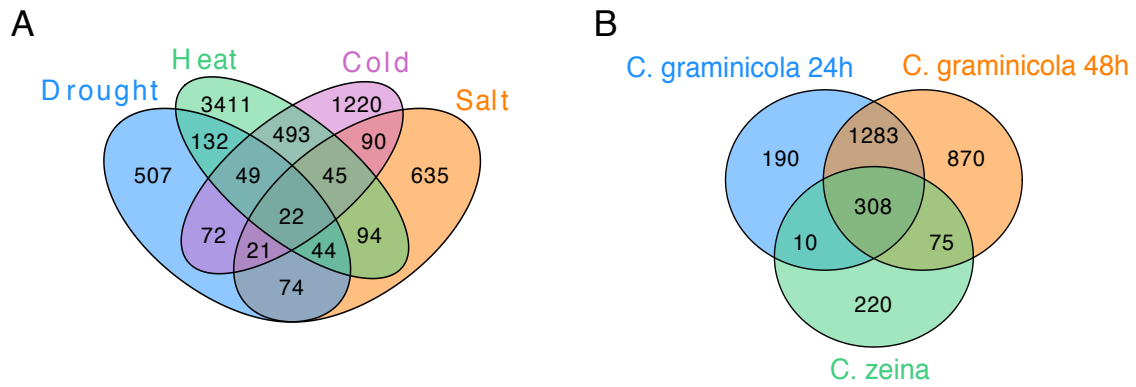

**Figure S3: Stress-Induced Gene Expression Venn Diagram**

**A.** Venn diagram of genes differentially expressed under drought, heat, cold, and salt stress. **B.** Venn diagram of genes differentially expressed under *Colletotrichum graminicola* and *Cercospora zeina* infection. *C. graminicola* infection was distinguished by two time points: 24 hours and 48 hours after infection.
