# Supplementary material for: An updated gene atlas for maize reveals organ‐specific and stress‐induced genes
Source: PubMed Central journal article supplement (PMC6850026; doi:10.1111/tpj.14184), 2019-01-22
Supplement: TPJ-97-1154-s005.pdf [file TPJ-97-1154-s005.pdf]

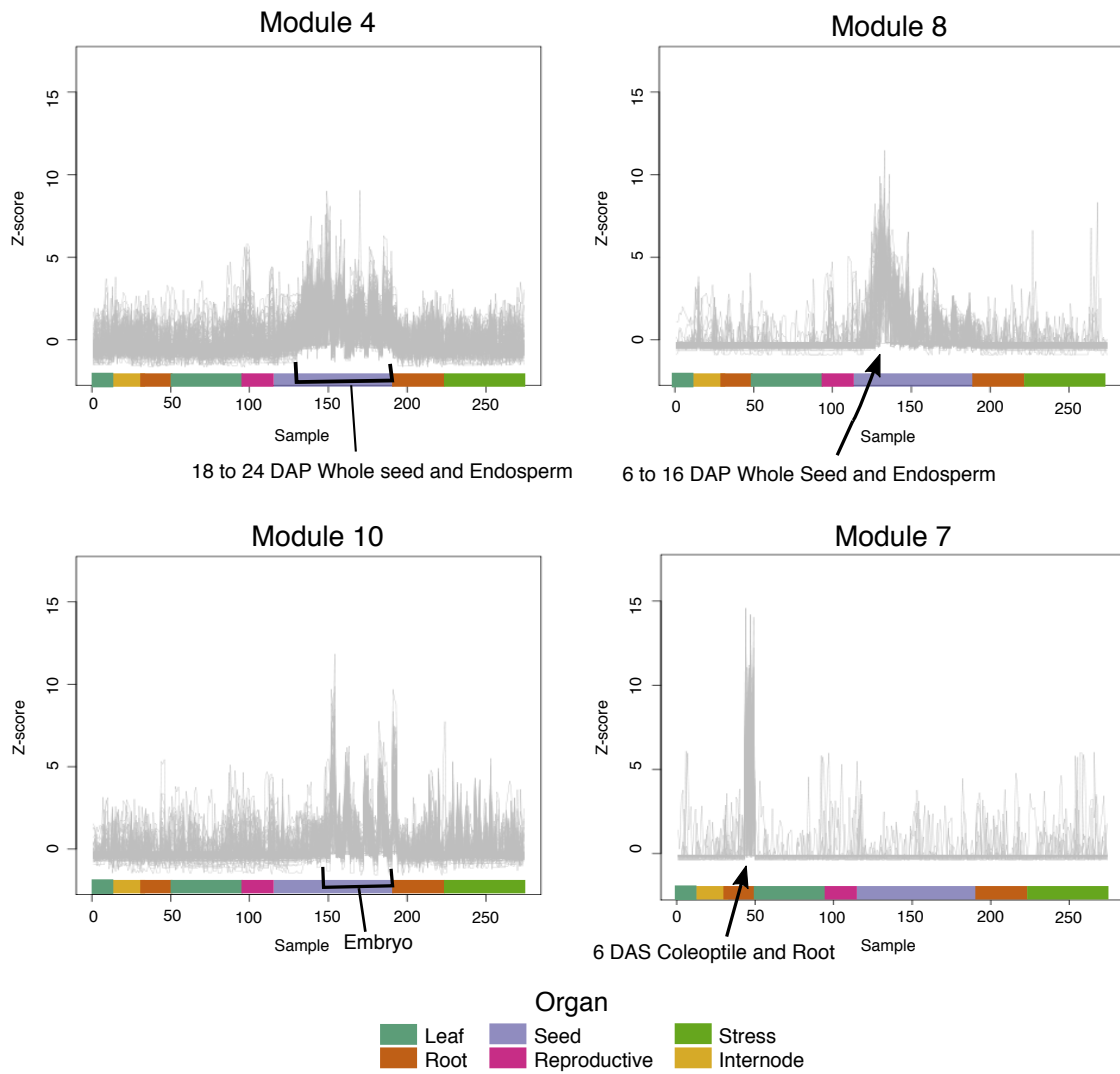

**Figure S5: Z Score Expression Graph for Modules 4, 7, 8, and 10**

Z score expression values were calculated from the Fragments Per Kilobase of transcript per Million mapped reads for each co-expression module identified from weighted gene co-expression network analysis. Z scores were graphed by sample for all genes in Modules 4, 7, 8, and 10. Organs and samples with peak expression values in each module are indicated on the x-axis with the horizontal bars and text, respectively. 'DAP' refers to days after pollination and 'DAS' refers to days after sowing.
