# Supplementary material for: An updated gene atlas for maize reveals organ‐specific and stress‐induced genes
Source: PubMed Central journal article supplement (PMC6850026; doi:10.1111/tpj.14184), 2019-01-22
Supplement: TPJ-97-1154-s006.pdf [file TPJ-97-1154-s006.pdf]

**Table S1: Number of Genes Present By Inbred**

|                          |        |       |       |       |       |      |   |
|--------------------------|--------|-------|-------|-------|-------|------|---|
| <b>Number of Inbreds</b> | All    | 61-57 | 56-52 | 51-42 | 41-21 | 20-1 | 0 |
| <b>Number of Genes</b>   | 27,034 | 5,162 | 2,153 | 2,254 | 1,815 | 581  | 6 |

The number of genes present in each sub-division of inbreds. Brohammer et al. (2018) identified the presence-absence variants from re-sequencing data for 62 inbreds and used a CDS coverage of 20% to define a presence-absence variant (Brohammer *et al.*, 2018).
