# Supplementary material for: An updated gene atlas for maize reveals organ‐specific and stress‐induced genes
Source: PubMed Central journal article supplement (PMC6850026; doi:10.1111/tpj.14184), 2019-01-22
Supplement: TPJ-97-1154-s007.pdf [file TPJ-97-1154-s007.pdf]

**Table S2: Weighted Gene Co-Expression Network Analysis Module Composition**

| Module | Internode | Leaf   | Reproductive | Root | Seed | Abiotic | Biotic | Both Stresses | Total |
|--------|-----------|--------|--------------|------|------|---------|--------|---------------|-------|
| 1      | 0         | 0      | 59*          | 1    | 0    | 36      | 8      | 4             | 213   |
| 2      | 1         | 0      | 7            | 0    | 7    | 736*    | 65     | 87            | 2,223 |
| 3      | 0         | 1      | 11           | 625* | 0    | 513     | 242*   | 143           | 2,093 |
| 4      | 0         | 0      | 0            | 0    | 276* | 63      | 18     | 9             | 374   |
| 5      | 0         | 1      | 0            | 0    | 1    | 36*     | 0      | 4             | 43    |
| 6      | 40*       | 202    | 30           | 107  | 28   | 1207    | 633*   | 527*          | 4,836 |
| 7      | 0         | 0      | 0            | 0    | 0    | 9       | 1      | 1             | 107   |
| 8      | 0         | 0      | 0            | 0    | 111* | 15      | 1      | 3             | 169   |
| 9      | 0         | 3      | 0            | 1    | 0    | 8       | 14*    | 27*           | 52    |
| 10     | 0         | 0      | 0            | 0    | 124* | 71      | 17     | 13            | 224   |
| 11     | 2         | 1,356* | 5            | 0    | 0    | 536     | 226    | 184           | 2,374 |
| 12     | 1         | 2      | 359*         | 2    | 3    | 129     | 35     | 17            | 882   |

The number of organ-specific and stress-induced differentially expressed genes in each co-expression module with the total number of genes indicated. Cells with a colored background indicate enrichment for the specific organ or stress type. \*Modules enriched for organ-specific or stress-induced DE genes with an adjusted p-value < 0.001.
